# Supplementary material
Source: Springer Nature journal article supplement (https://www.springermedizin.de/resource/supplementary/12895_2013_155_MOESM3_ESM.pdf/9514232)

# Hand eczema (%)

HX95 HX9508 HX08

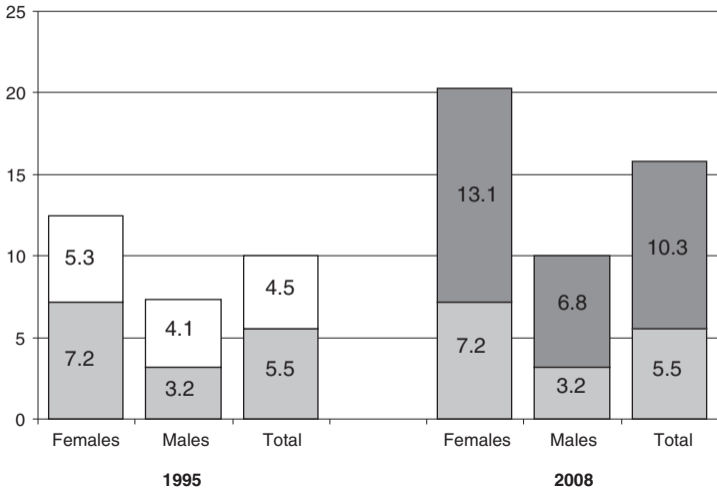

Supplement: MOESM3 [file 9514232]
